# Supplementary material
Source: Elsevier journal article supplement (https://comptes-rendus.academie-sciences.fr/chimie/article/10.1016/j.crci.2017.02.001/file/attach/mmc1.pdf)

## Supporting Information

### Synthesis of allenylzinc reagents by 1,2-rearrangement of alkynyl(disilyl)zincates derived from acetylenic epoxides and acetylenic aziridines

Valentin N. Bochatay, Laurent Debien, Fabrice Chemla,\* Franck Ferreira,\* Olivier Jackowski  
and Alejandro Perez-Luna\*

*Sorbonne Universités, UPMC Univ Paris 06, CNRS UMR 8232, Institut Parisien de Chimie Moléculaire  
(IPC), 4, place Jussieu, F-75005 Paris, France*

\* E-mail: [fabrice.chemla@upmc.fr](mailto:fabrice.chemla@upmc.fr)

\* E-mail: [franck.ferreira@upmc.fr](mailto:franck.ferreira@upmc.fr)

\* E-mail: [alejandroperez\\_luna@upmc.fr](mailto:alejandroperezluna@upmc.fr)

NMR Spectra of **4**, **7a–c**, **12a**, **13a–b** and **14**.

7.6204  
7.6155  
7.6083  
7.6037  
7.5971  
7.3842  
7.3795  
7.3724  
7.3697  
7.3661  
7.2607

3.9862  
3.9784  
3.9645  
3.9566  
3.8575  
3.8517  
3.8442  
3.8378  
3.8312  
3.8237  
3.8182

2.7550  
2.7494  
2.7335  
2.7278

1.6993  
1.6564  
1.6515  
1.6381  
1.6341  
1.6257  
1.6221  
1.6169  
1.6129  
1.6035  
1.5911  
1.4314  
1.0215  
1.0028  
0.9841  
0.9547  
0.9493  
0.9361  
0.9306  
0.9180  
0.9122

<sup>1</sup>H NMR (400 MHz, CDCl<sub>3</sub>)

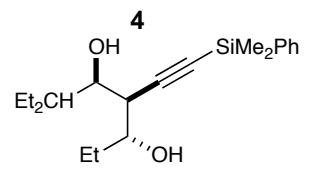

3.9862  
3.9784  
3.9645  
3.9566  
3.8575  
3.8517  
3.8442  
3.8378  
3.8312  
3.8237  
3.8182

2.7550  
2.7494  
2.7335  
2.7278

1.0215  
1.0028  
0.9841  
0.9547  
0.9493  
0.9361  
0.9306  
0.9180  
0.9122

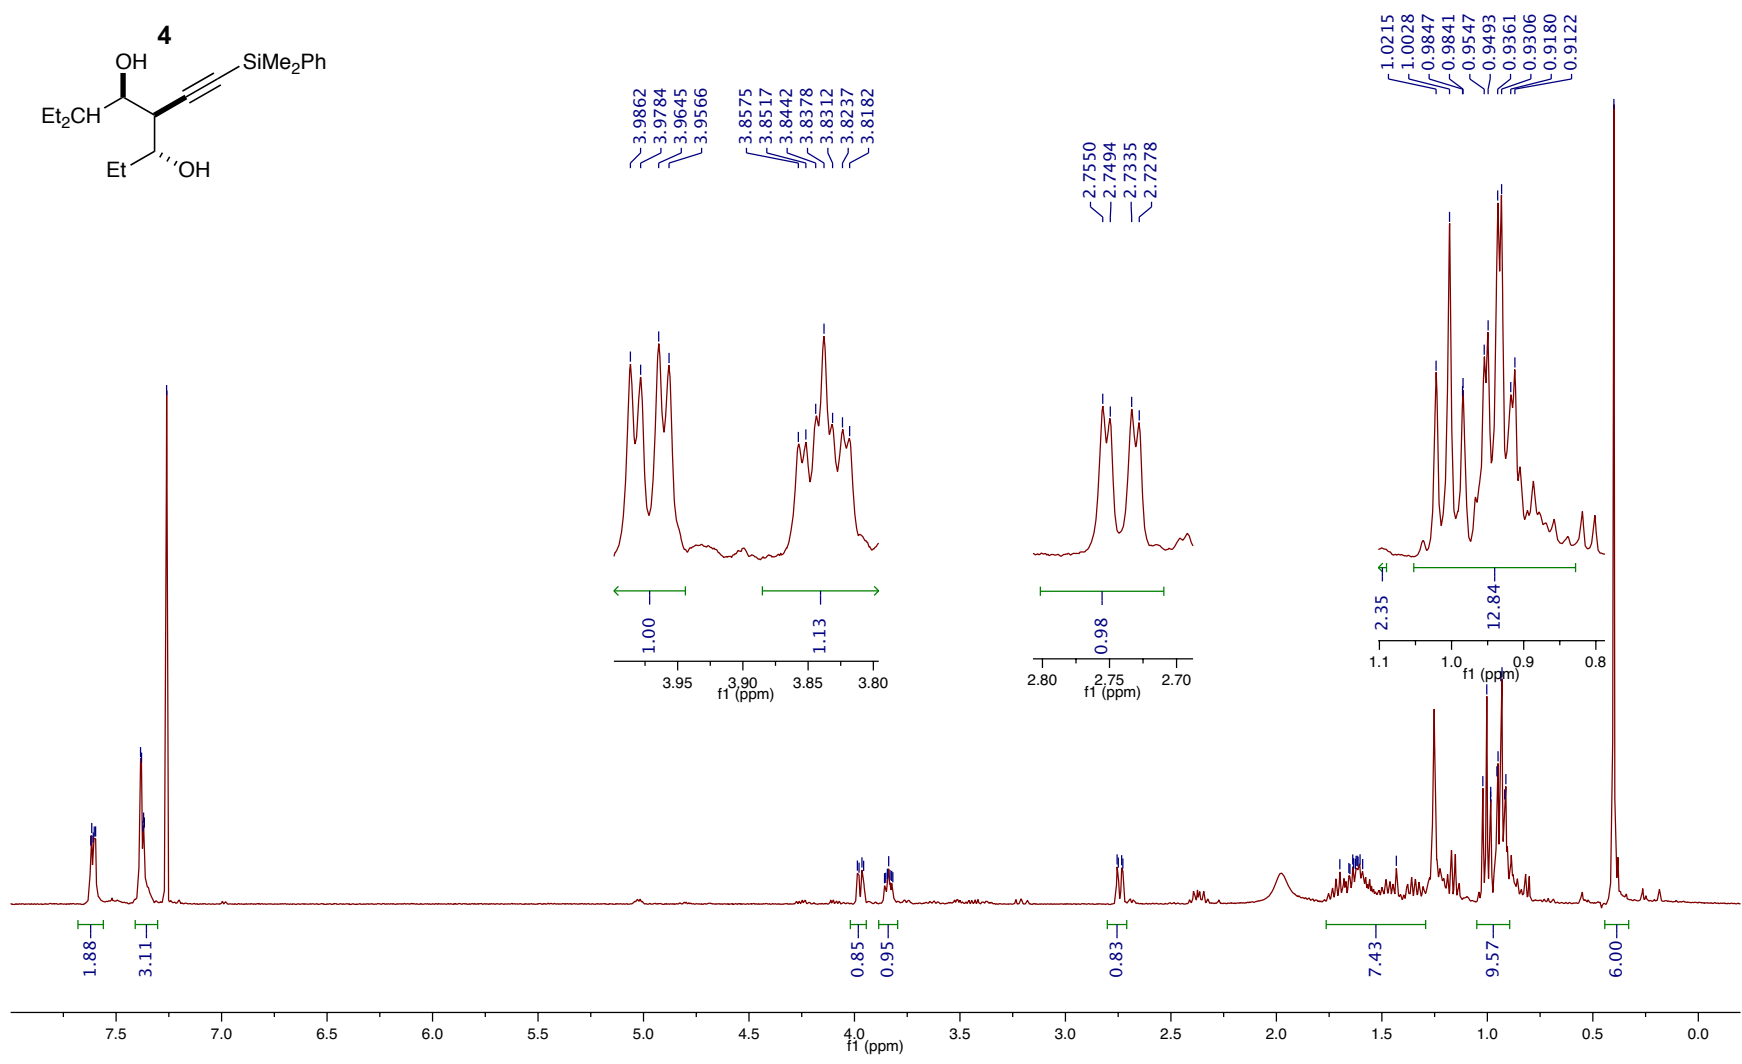

$^{13}\text{C}$  NMR (100 MHz,  $\text{CDCl}_3$ )

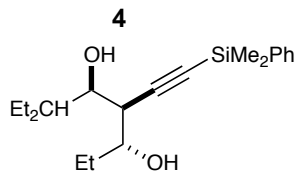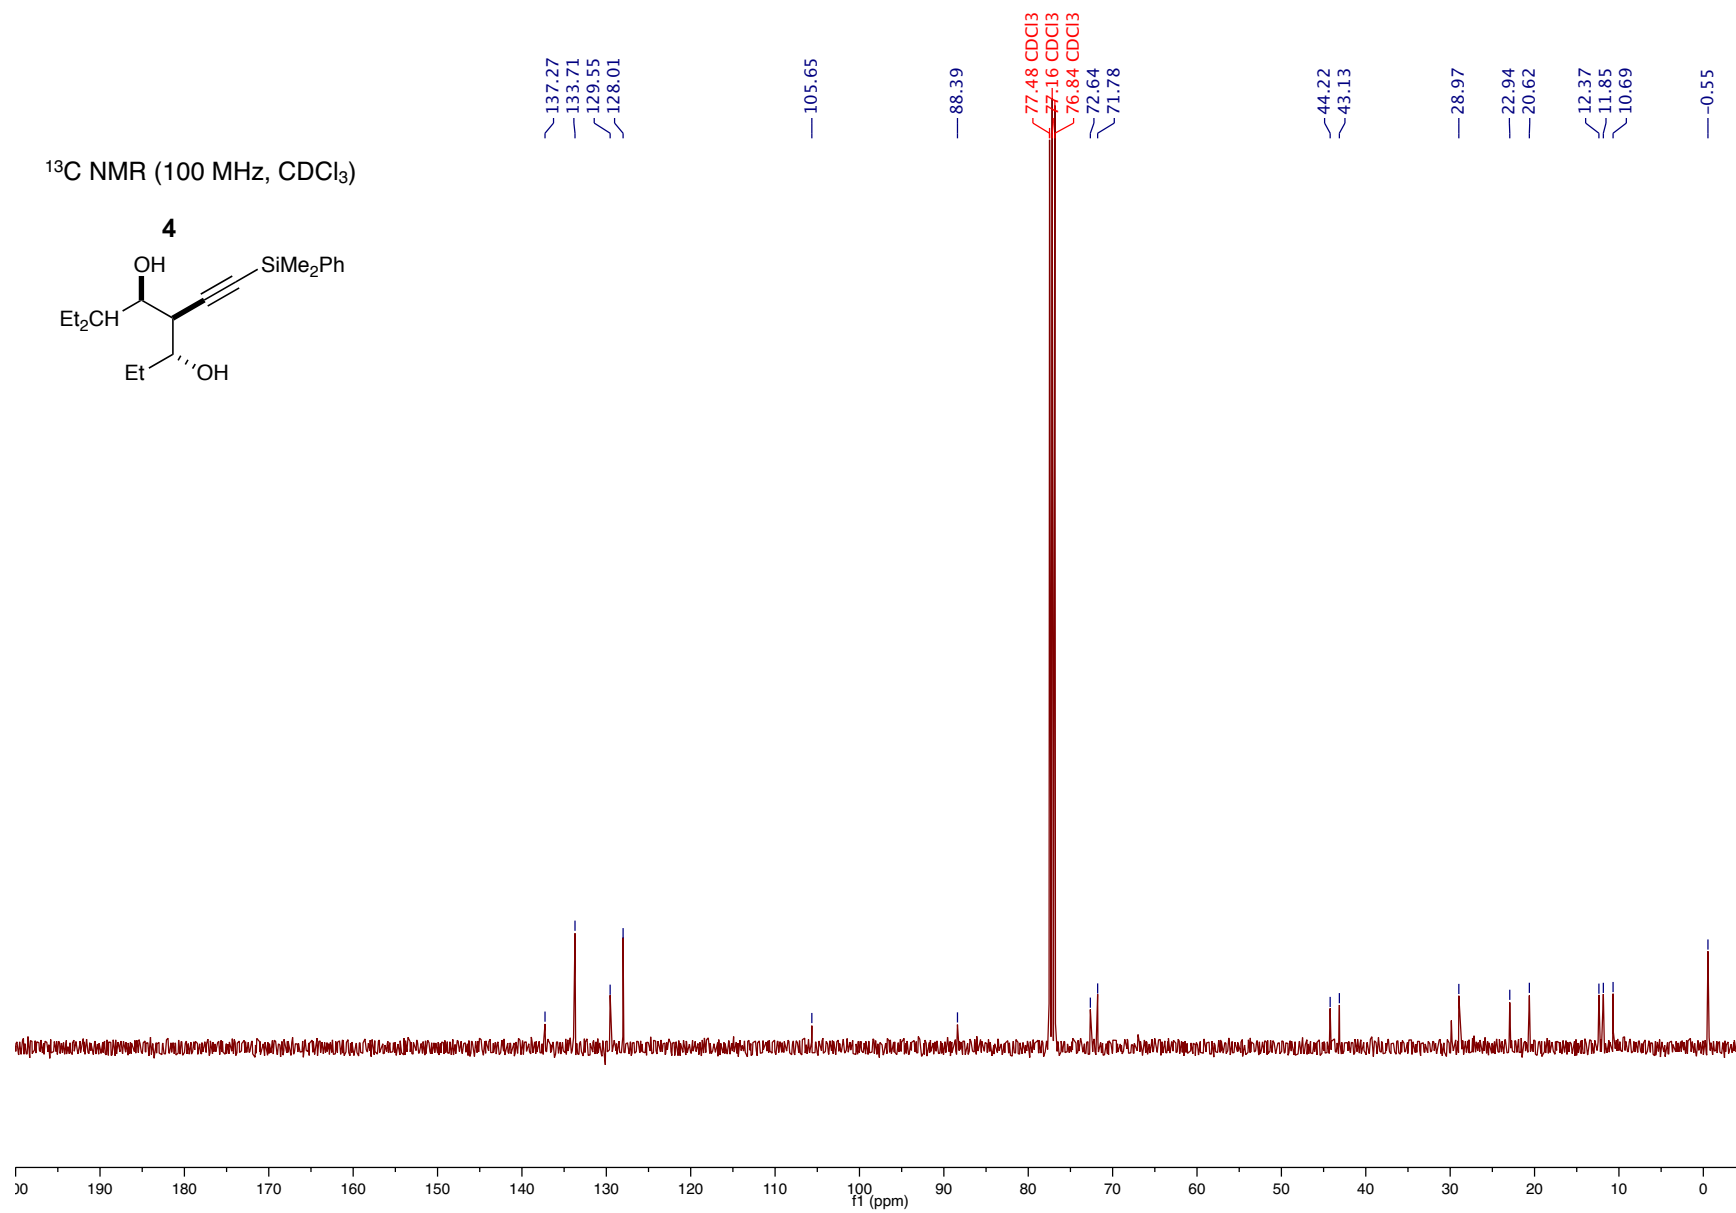

7.2596

<sup>1</sup>H NMR (400 MHz, CDCl<sub>3</sub>)

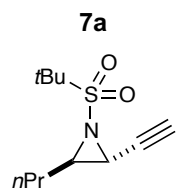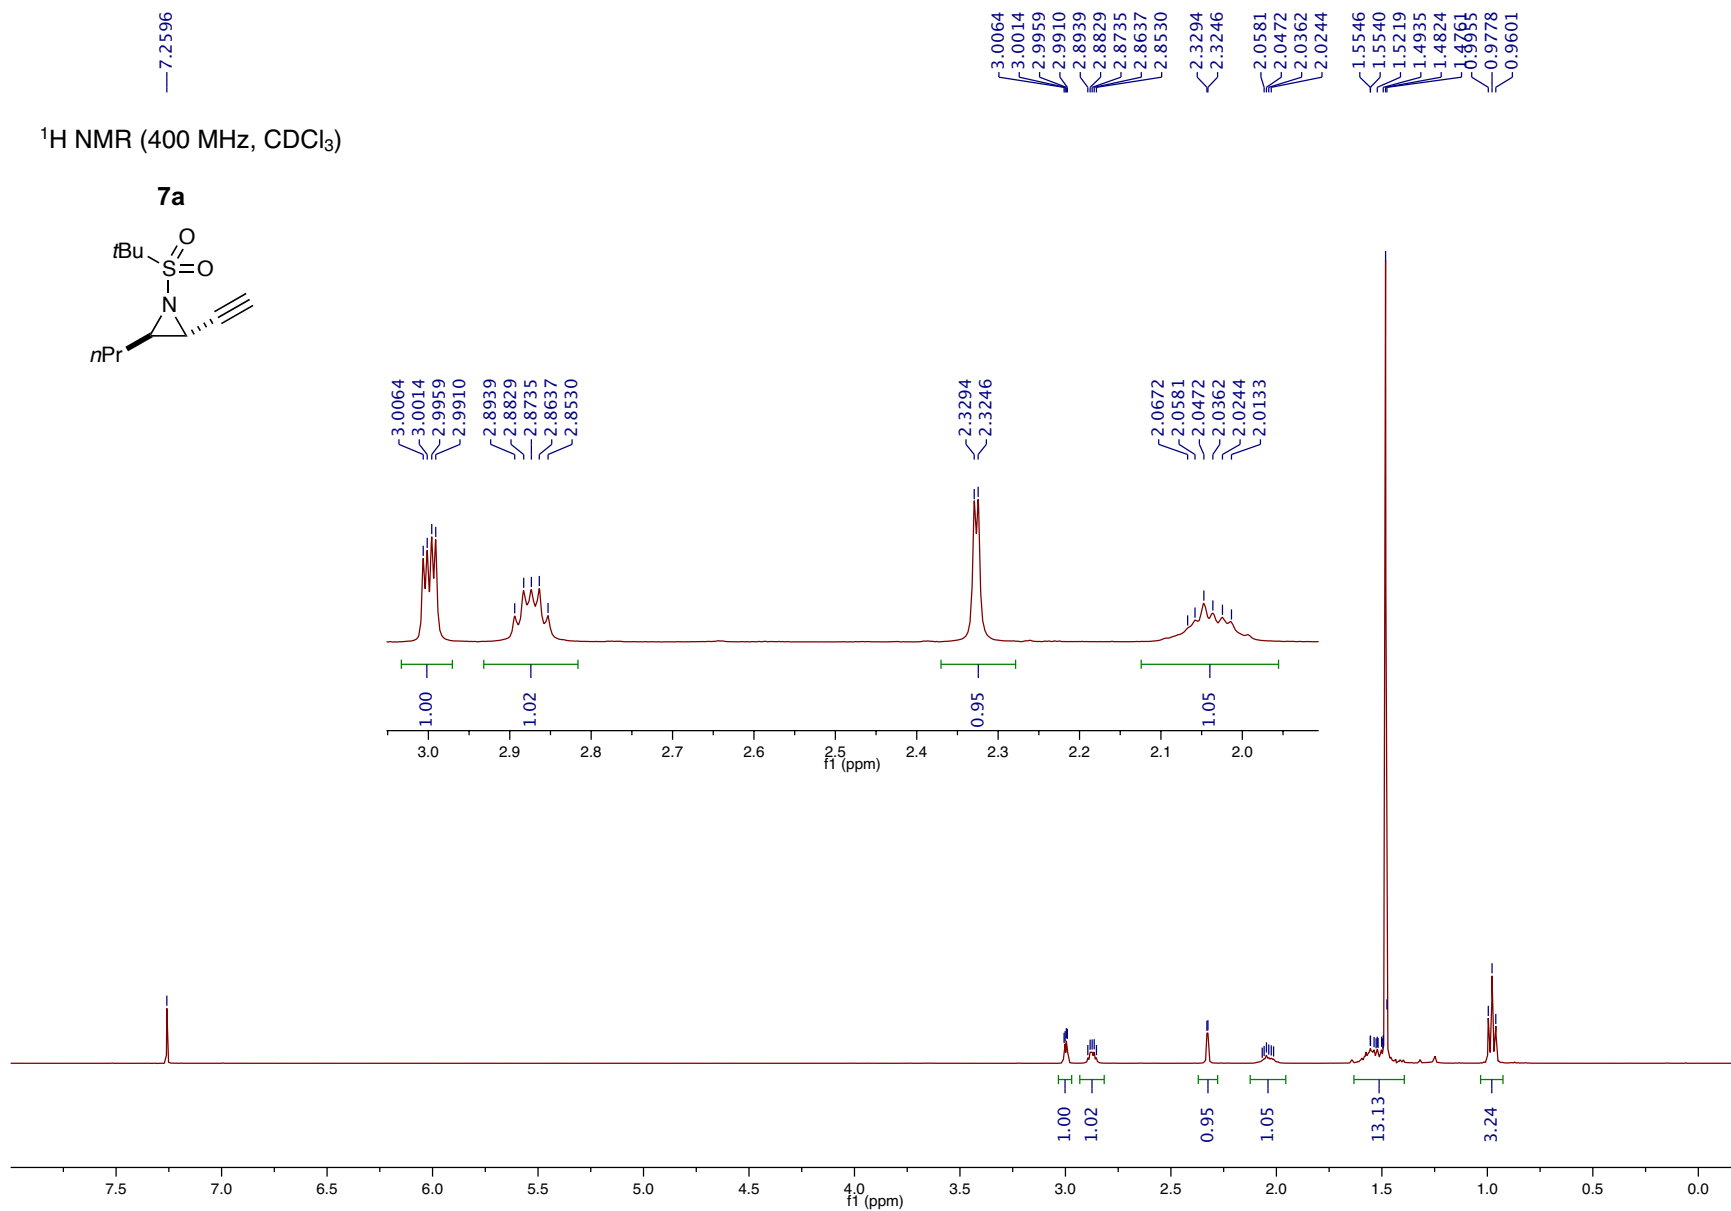

$^{13}\text{C}$  NMR (100 MHz,  $\text{CDCl}_3$ )

**7a**

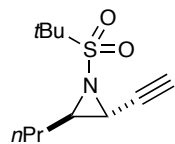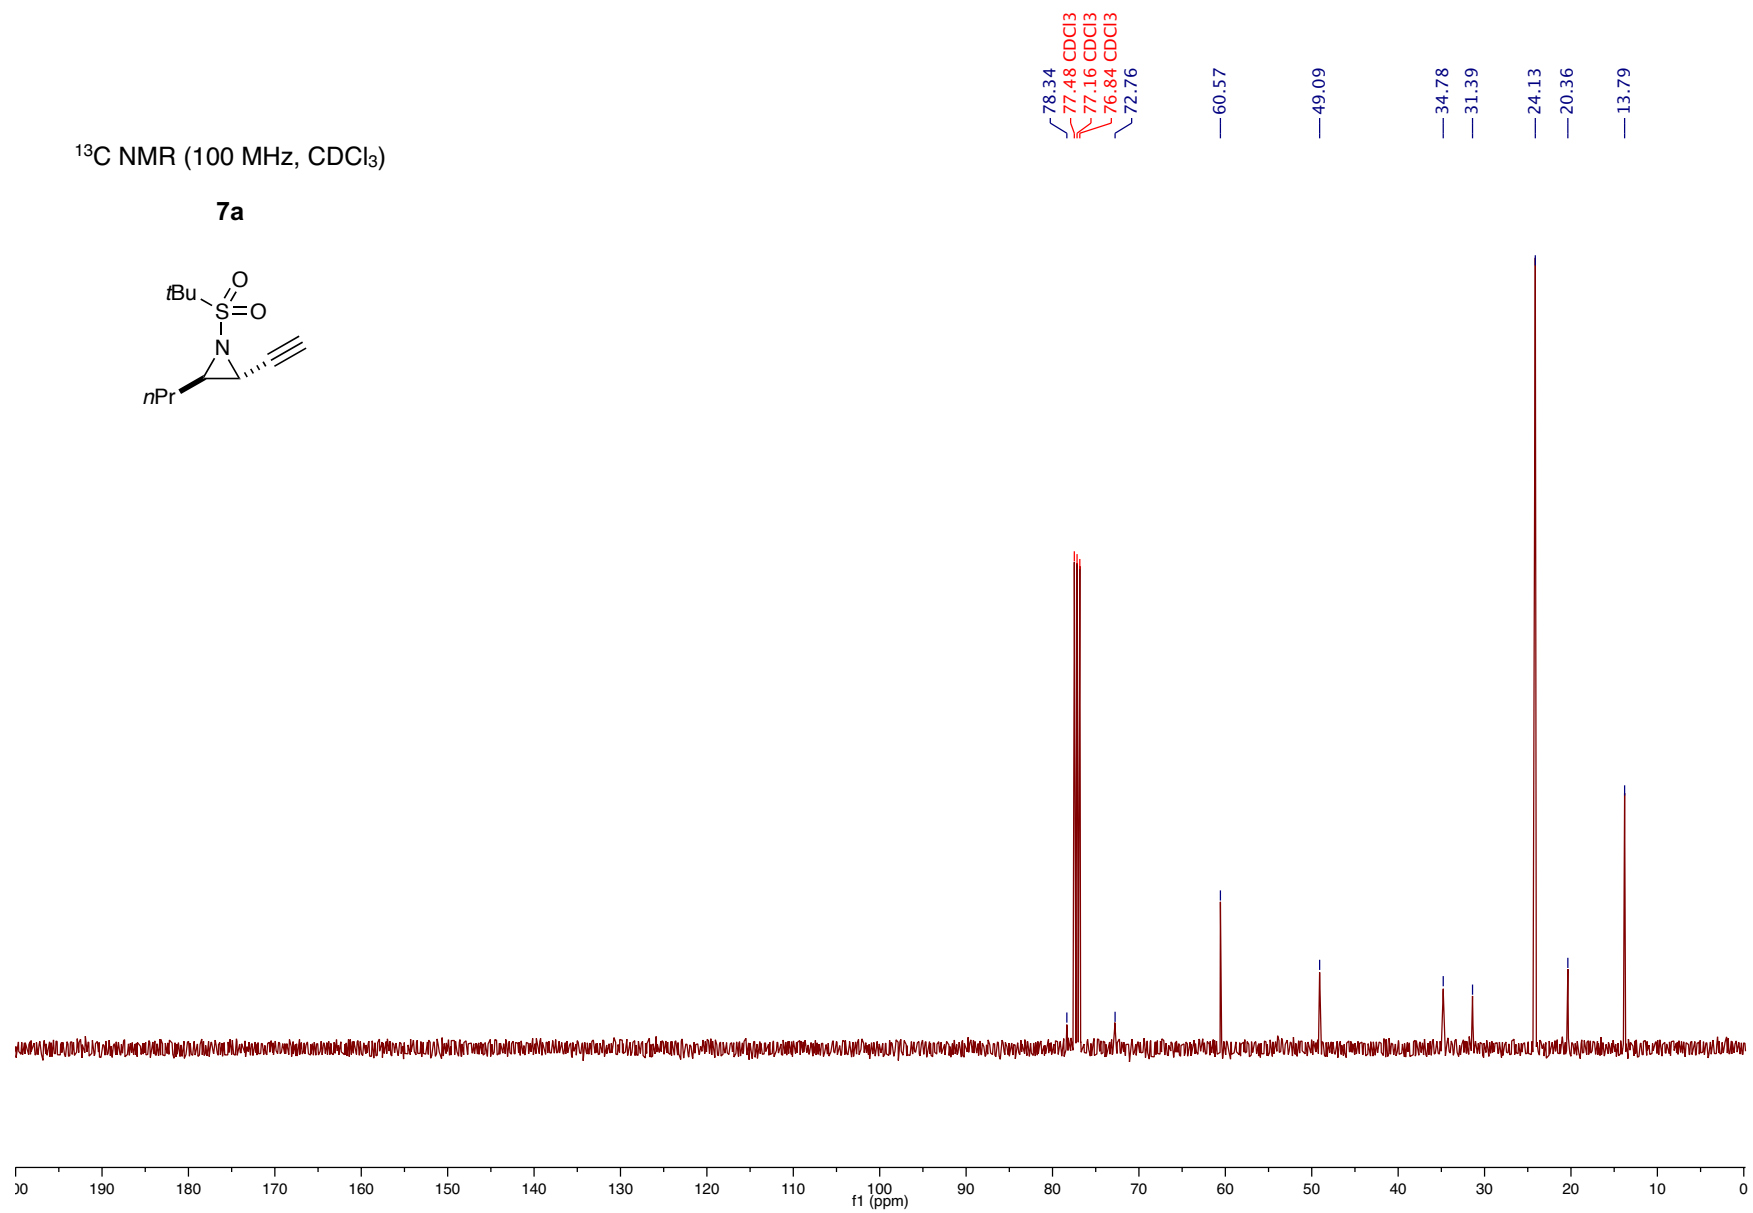

7.2604

<sup>1</sup>H NMR (400 MHz, CDCl<sub>3</sub>)

7b

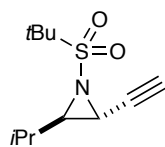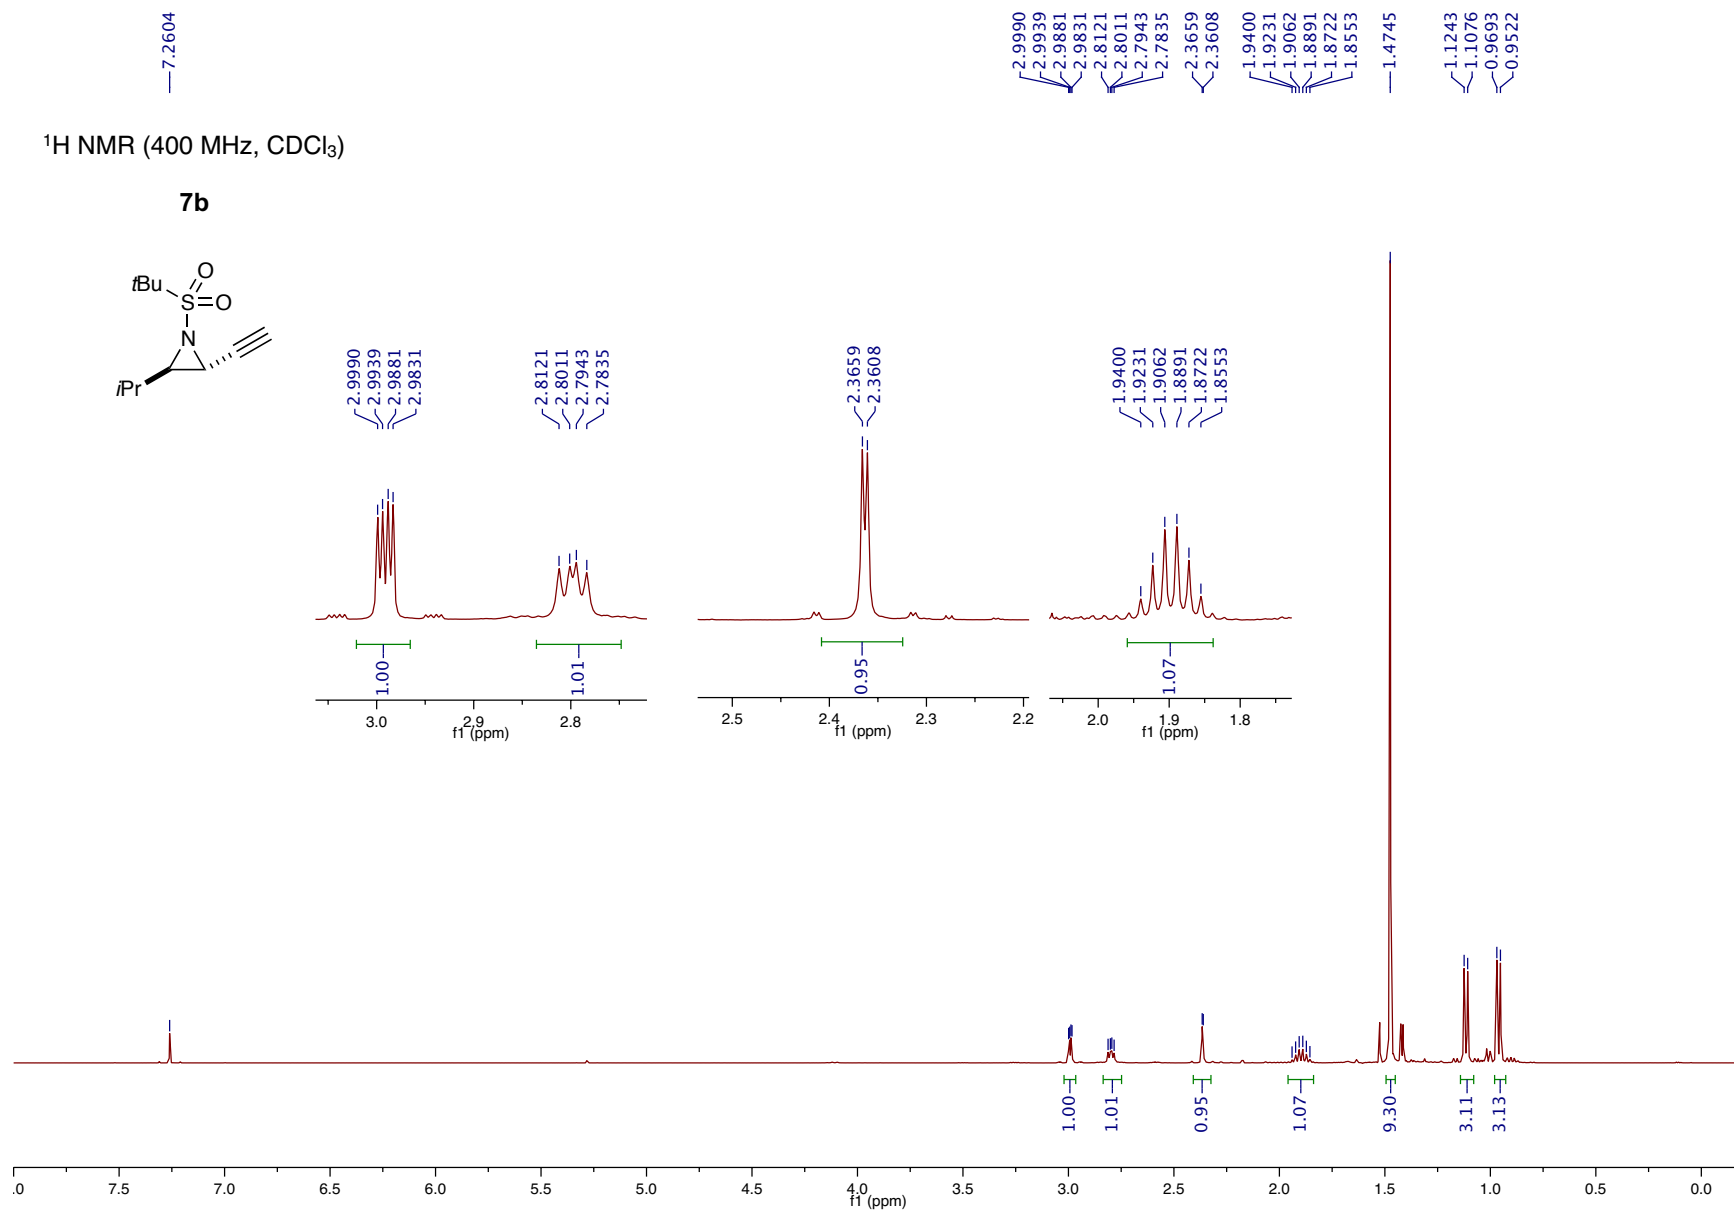

$^{13}\text{C}$  NMR (100 MHz,  $\text{CDCl}_3$ )

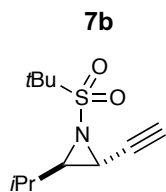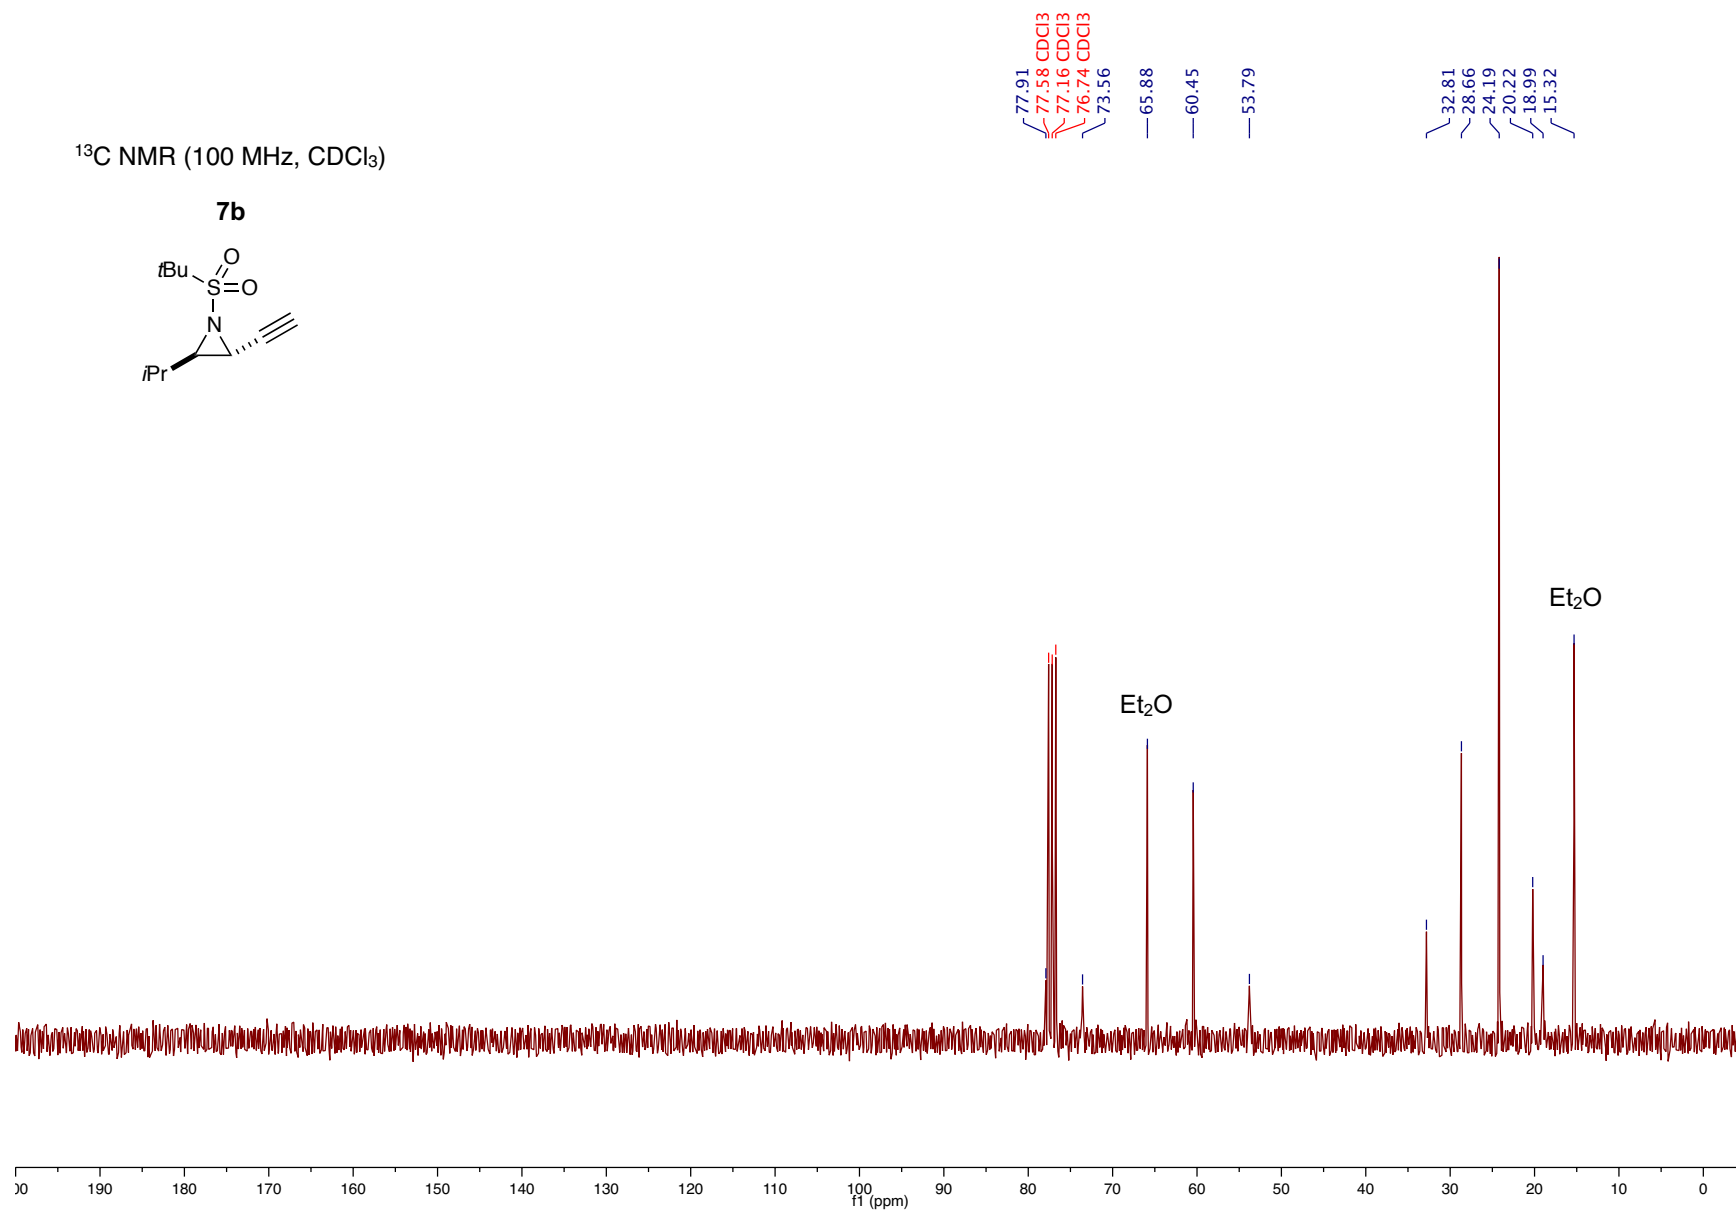

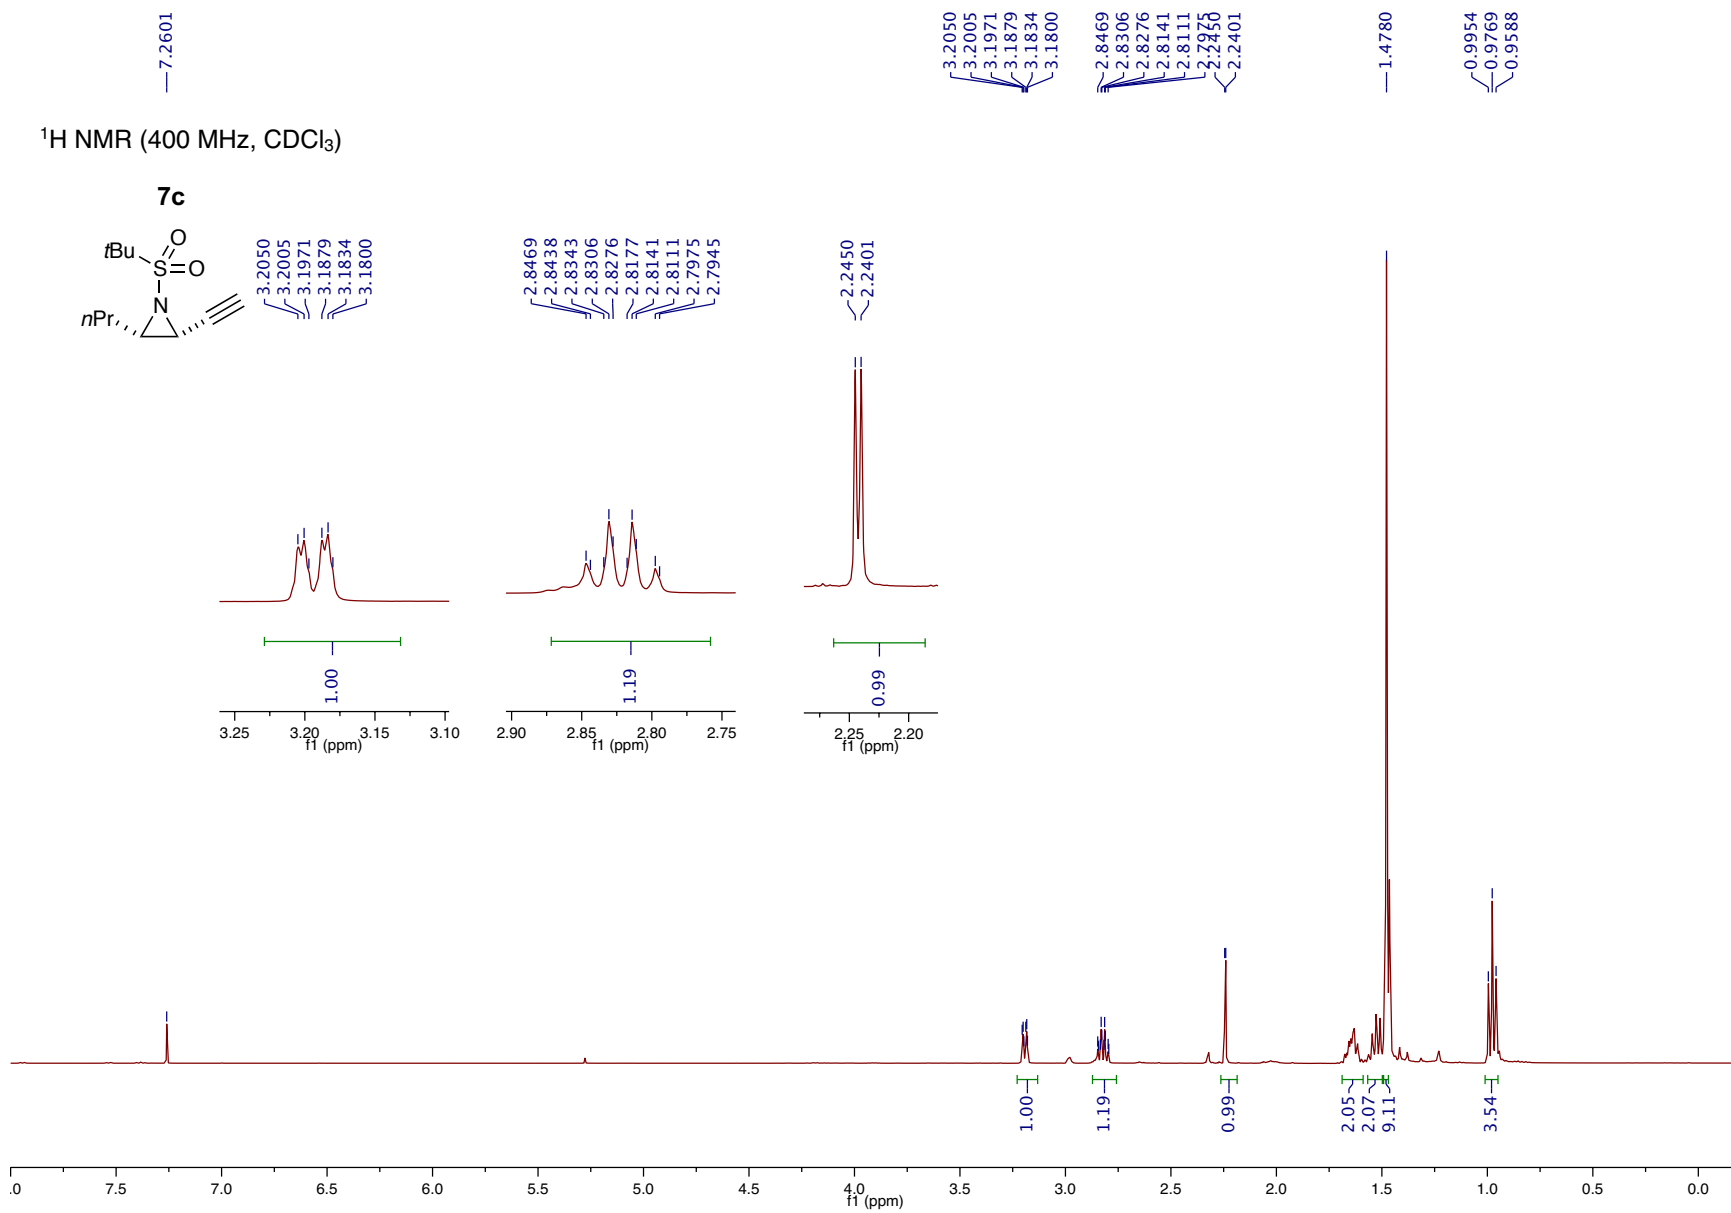



$^{13}\text{C}$  NMR (100 MHz,  $\text{CDCl}_3$ )

**7c**

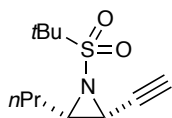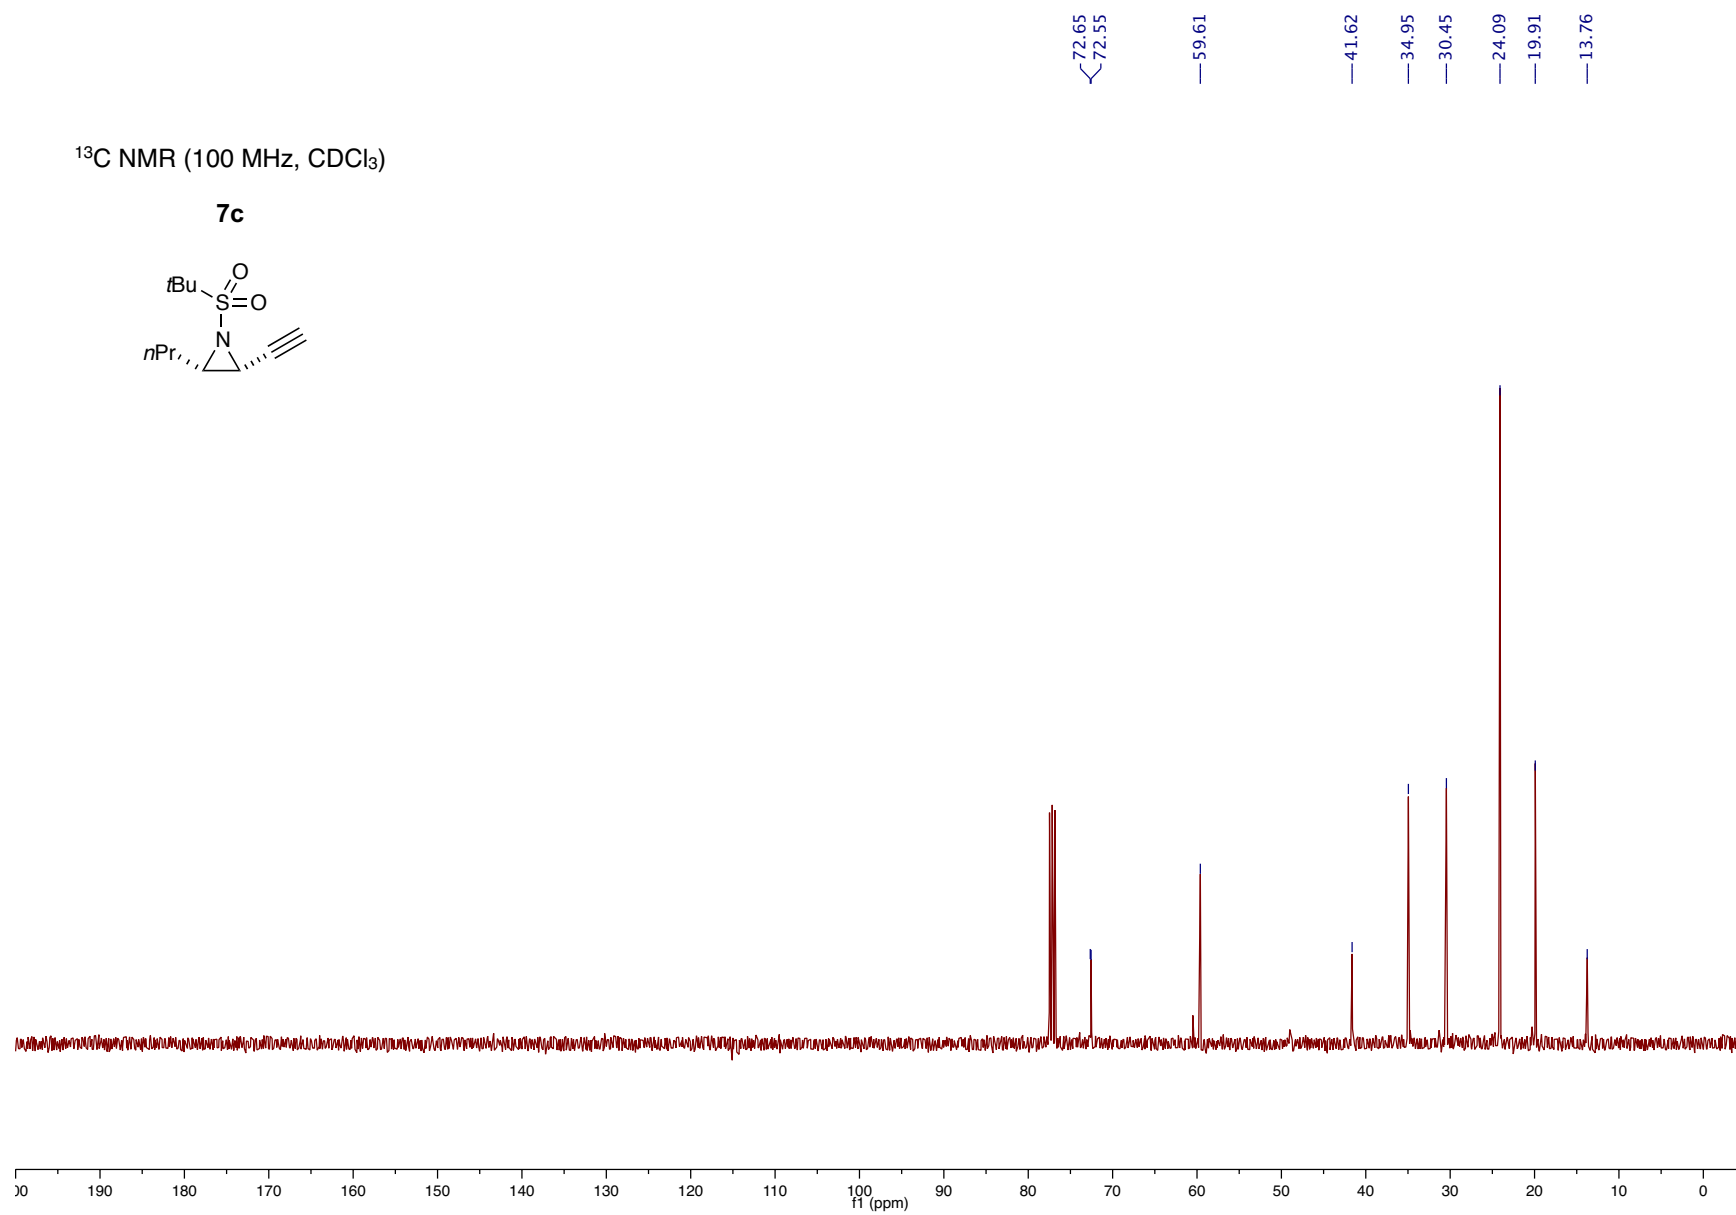

7.6245  
7.6228  
7.6156  
7.6132  
7.6063  
7.5998  
7.3730  
7.3699  
7.3682  
7.3605

3.5826  
3.5624  
3.4254  
3.4117  
3.4061  
3.3985  
3.3924  
3.3854  
3.3790  
3.3726  
3.3650  
3.3595  
3.3457

2.7520  
2.7503  
2.7358  
2.7099  
2.7082  
2.6954  
2.6937  
2.5845  
2.5830  
2.5728  
2.5711  
2.5425  
2.5407  
2.5400

1.5660  
1.3936  
1.3758  
1.1937  
1.1919  
0.9390  
0.9201  
0.9025

0.3984

<sup>1</sup>H NMR (400 MHz, CDCl<sub>3</sub>)

**12a**

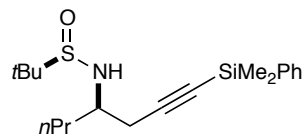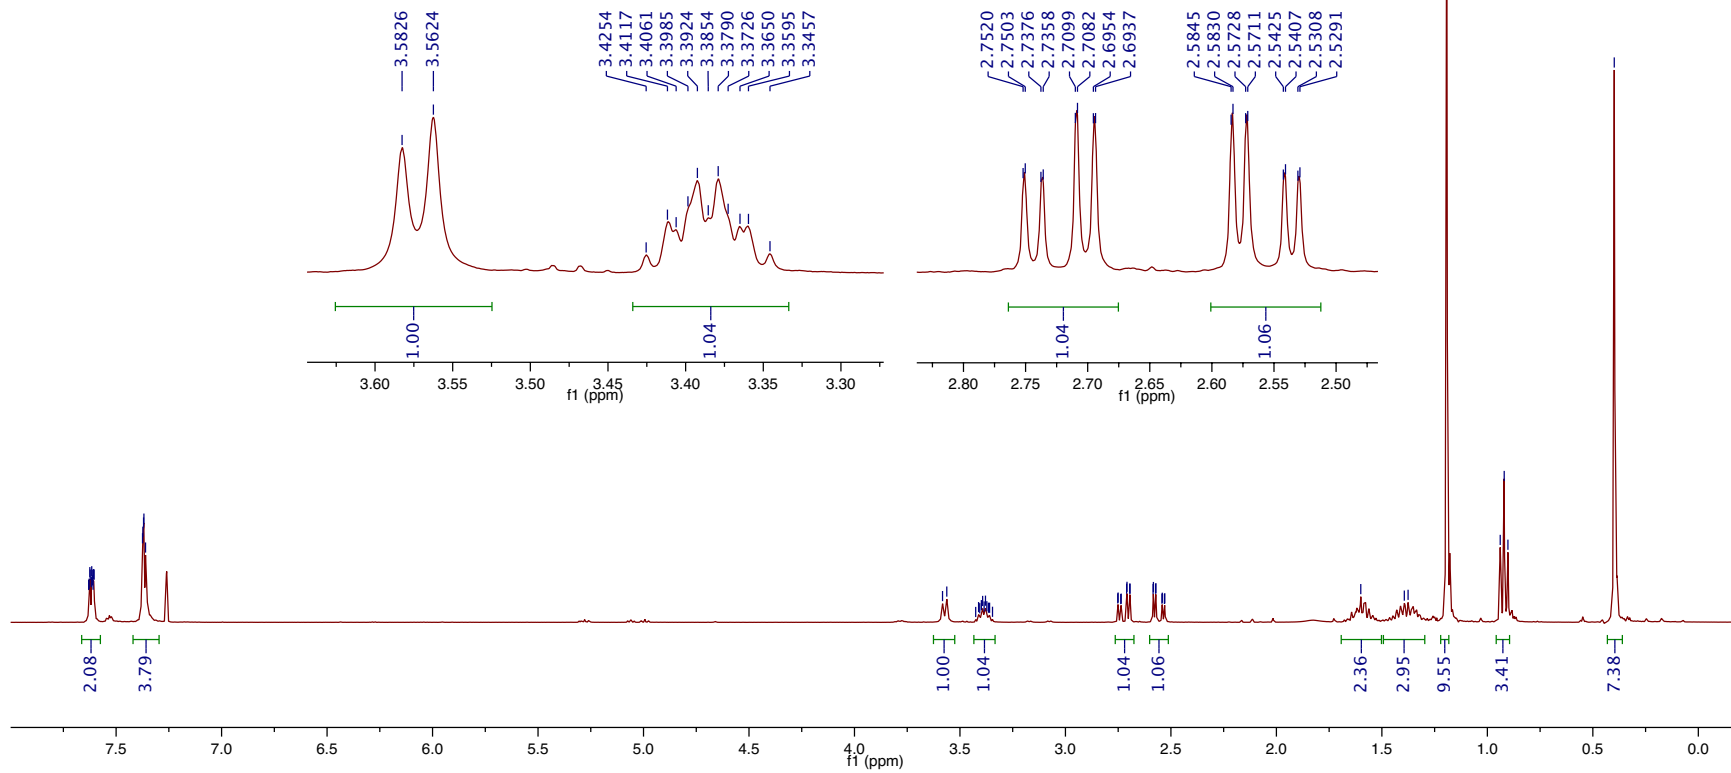

<sup>13</sup>C NMR (100 MHz, CDCl<sub>3</sub>)

**12a**

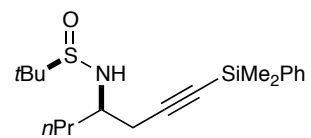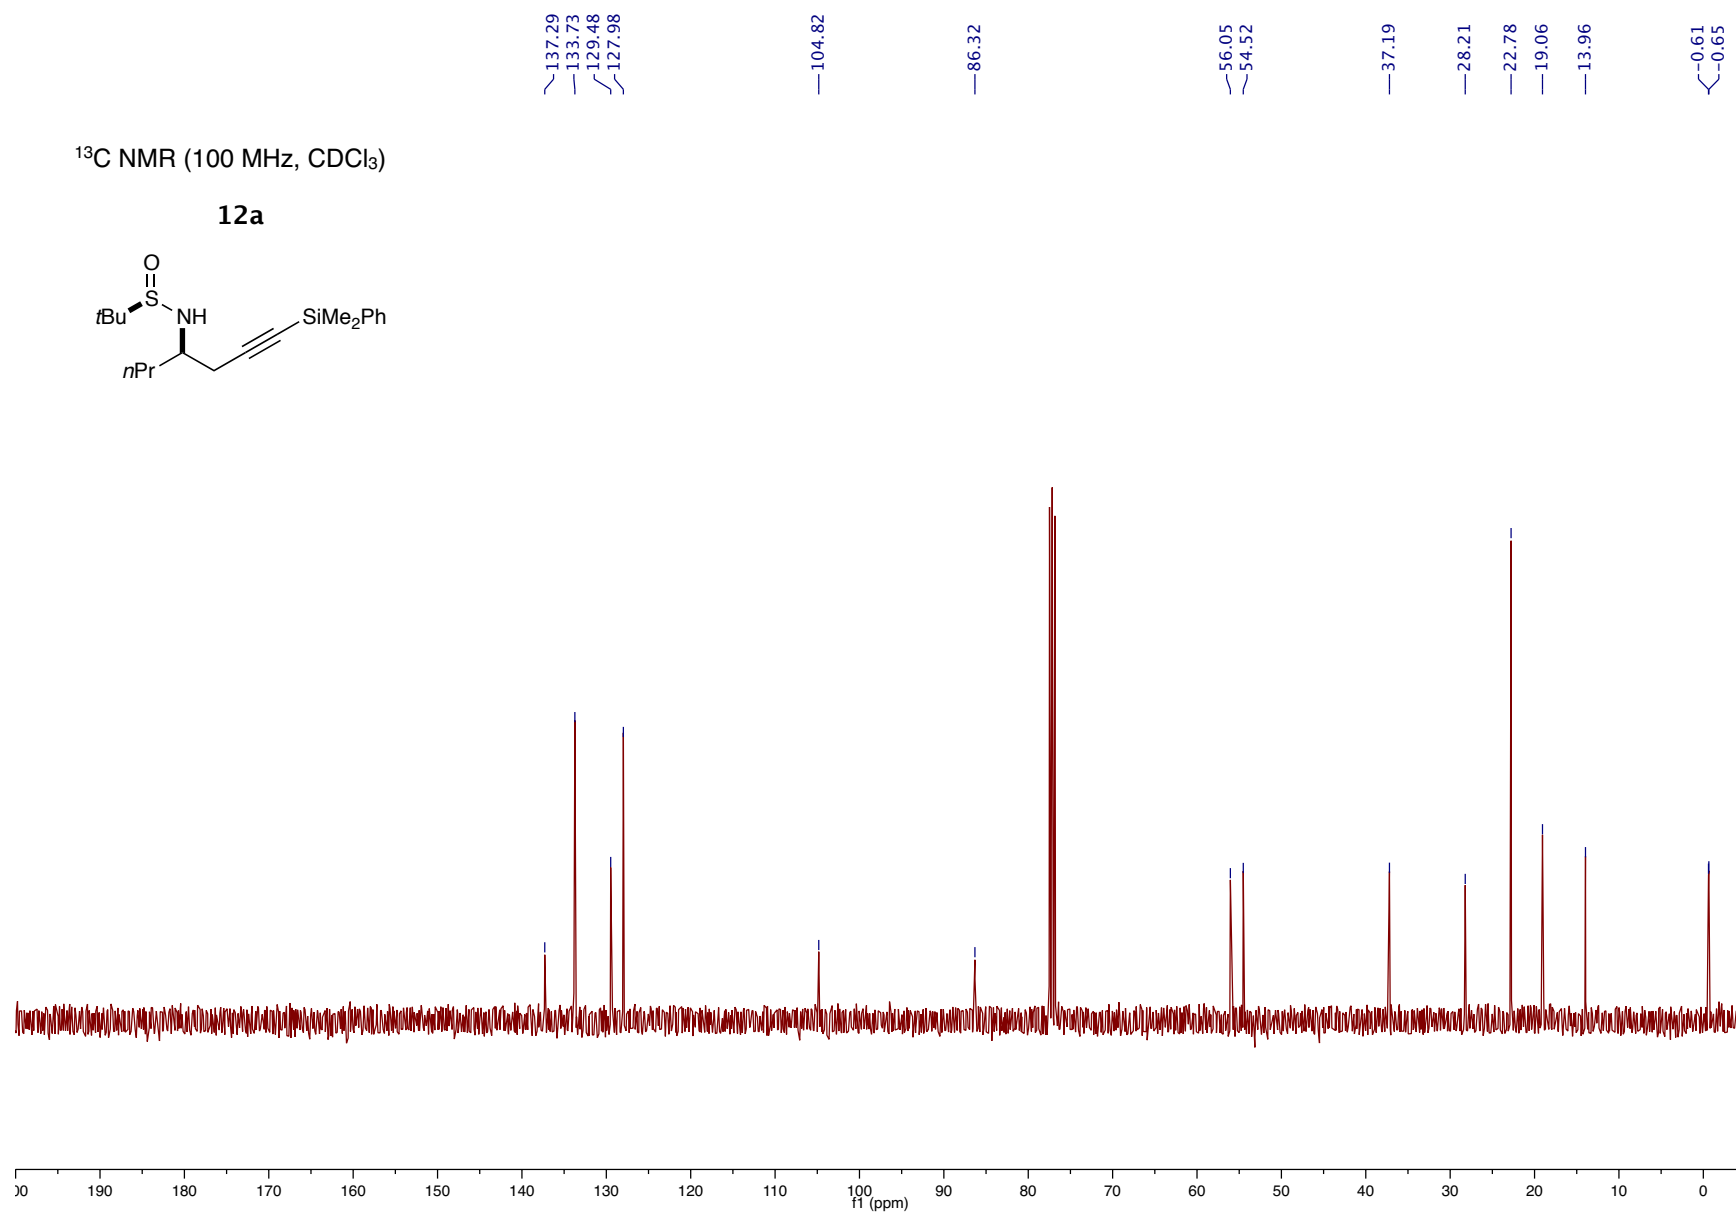

7.6318  
7.6265  
7.6183  
7.6163  
7.6081  
7.3908  
7.3884  
7.3830  
7.3756  
7.3713  
7.2603

4.0265  
4.0017  
3.4993  
3.4957  
3.4919  
3.4852  
3.4819  
3.4745  
3.4713  
3.4685  
2.6919  
2.6635  
2.6493  
2.5909  
2.5799  
2.5482  
2.5373  
1.7457  
1.7374  
1.7288  
1.7269  
1.7194  
1.7096  
1.3999  
1.0129  
0.9943  
0.9756

<sup>1</sup>H NMR (400 MHz, CDCl<sub>3</sub>)

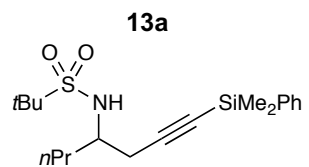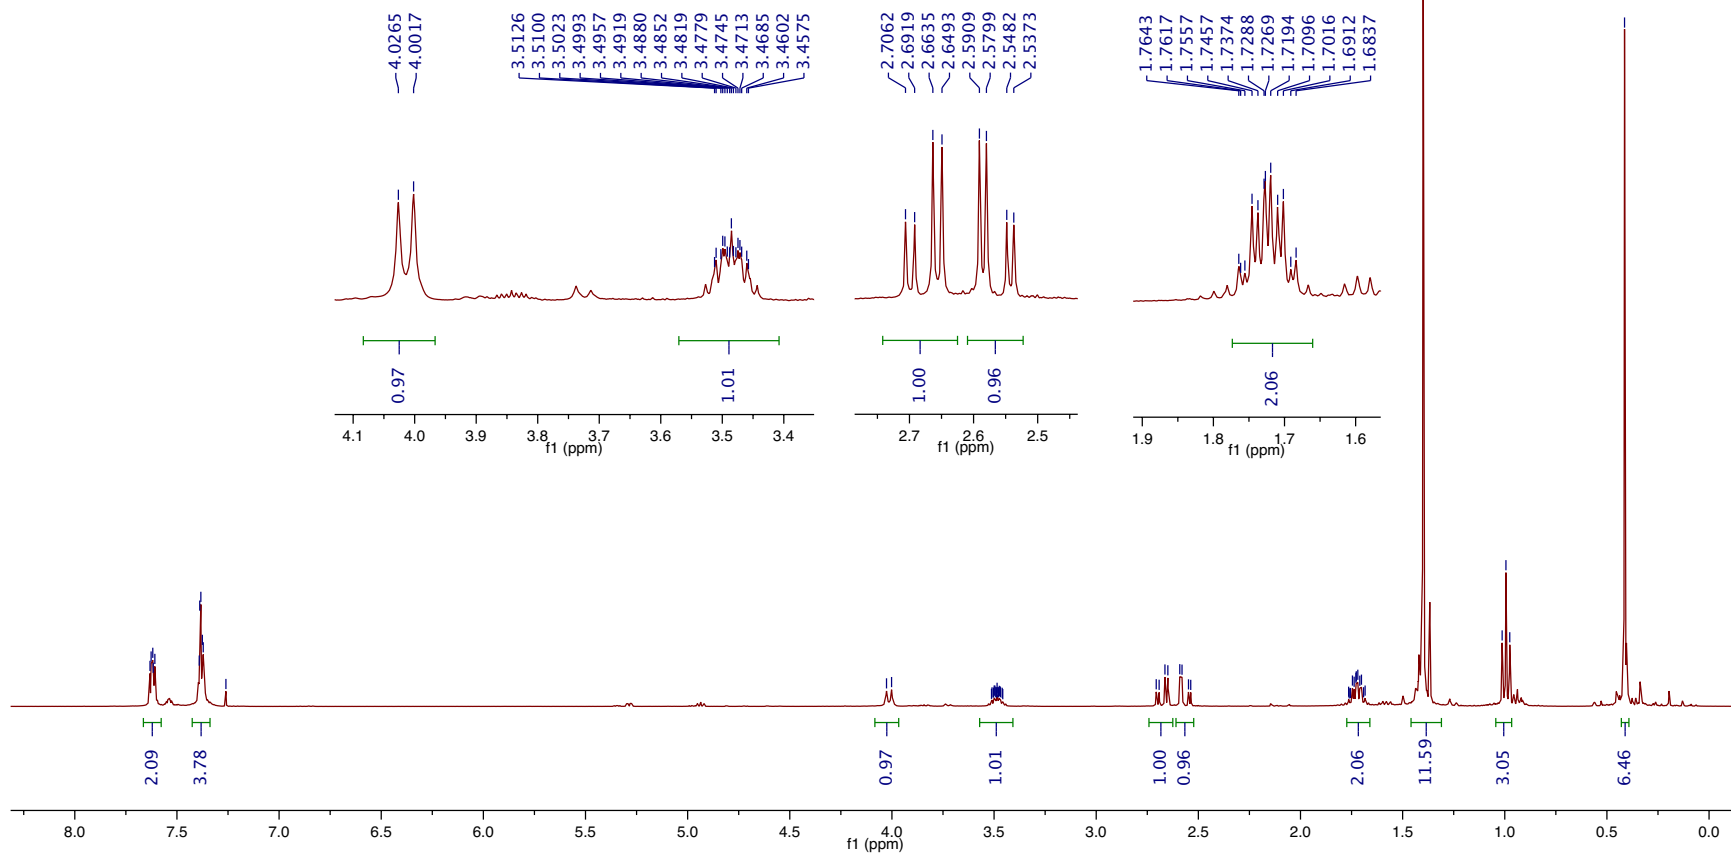

$^{13}\text{C}$  NMR (100 MHz,  $\text{CDCl}_3$ )

**13a**

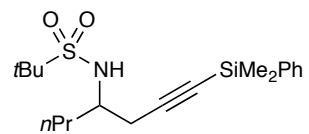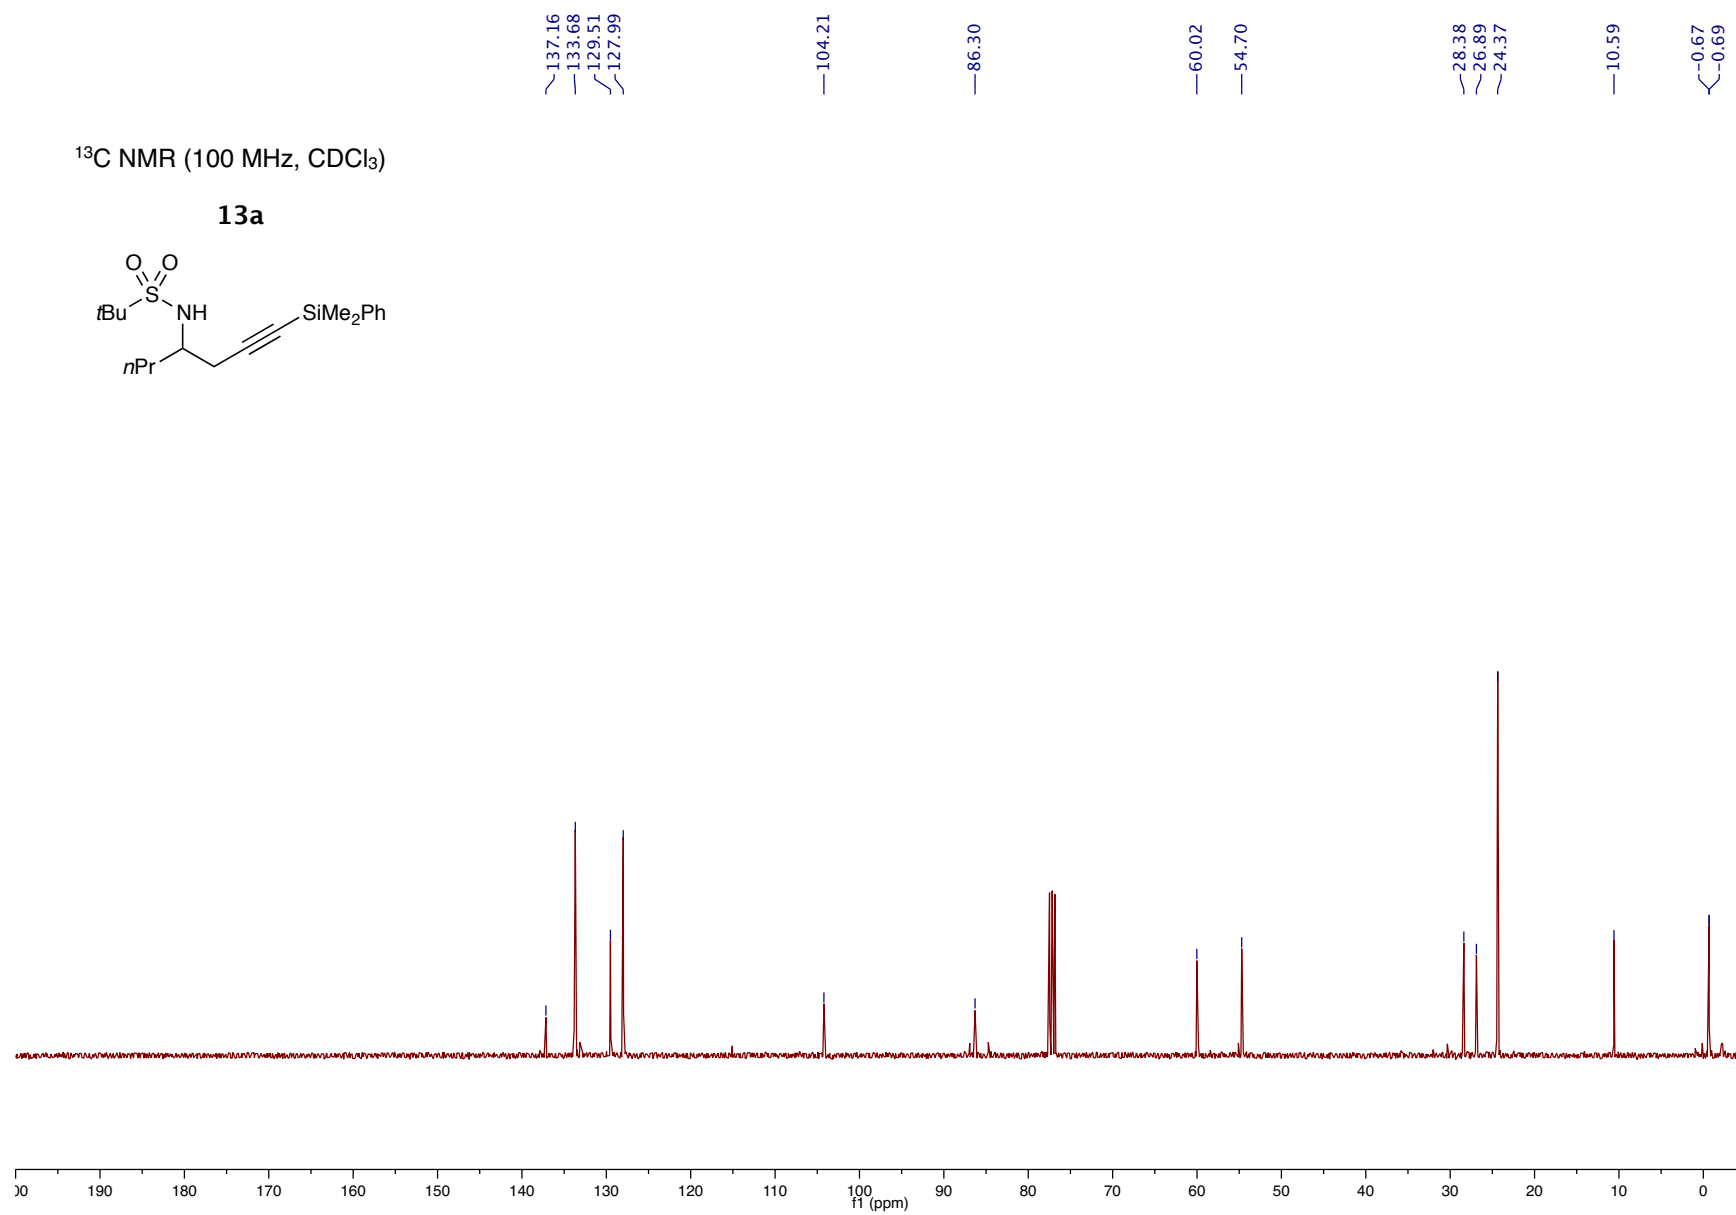

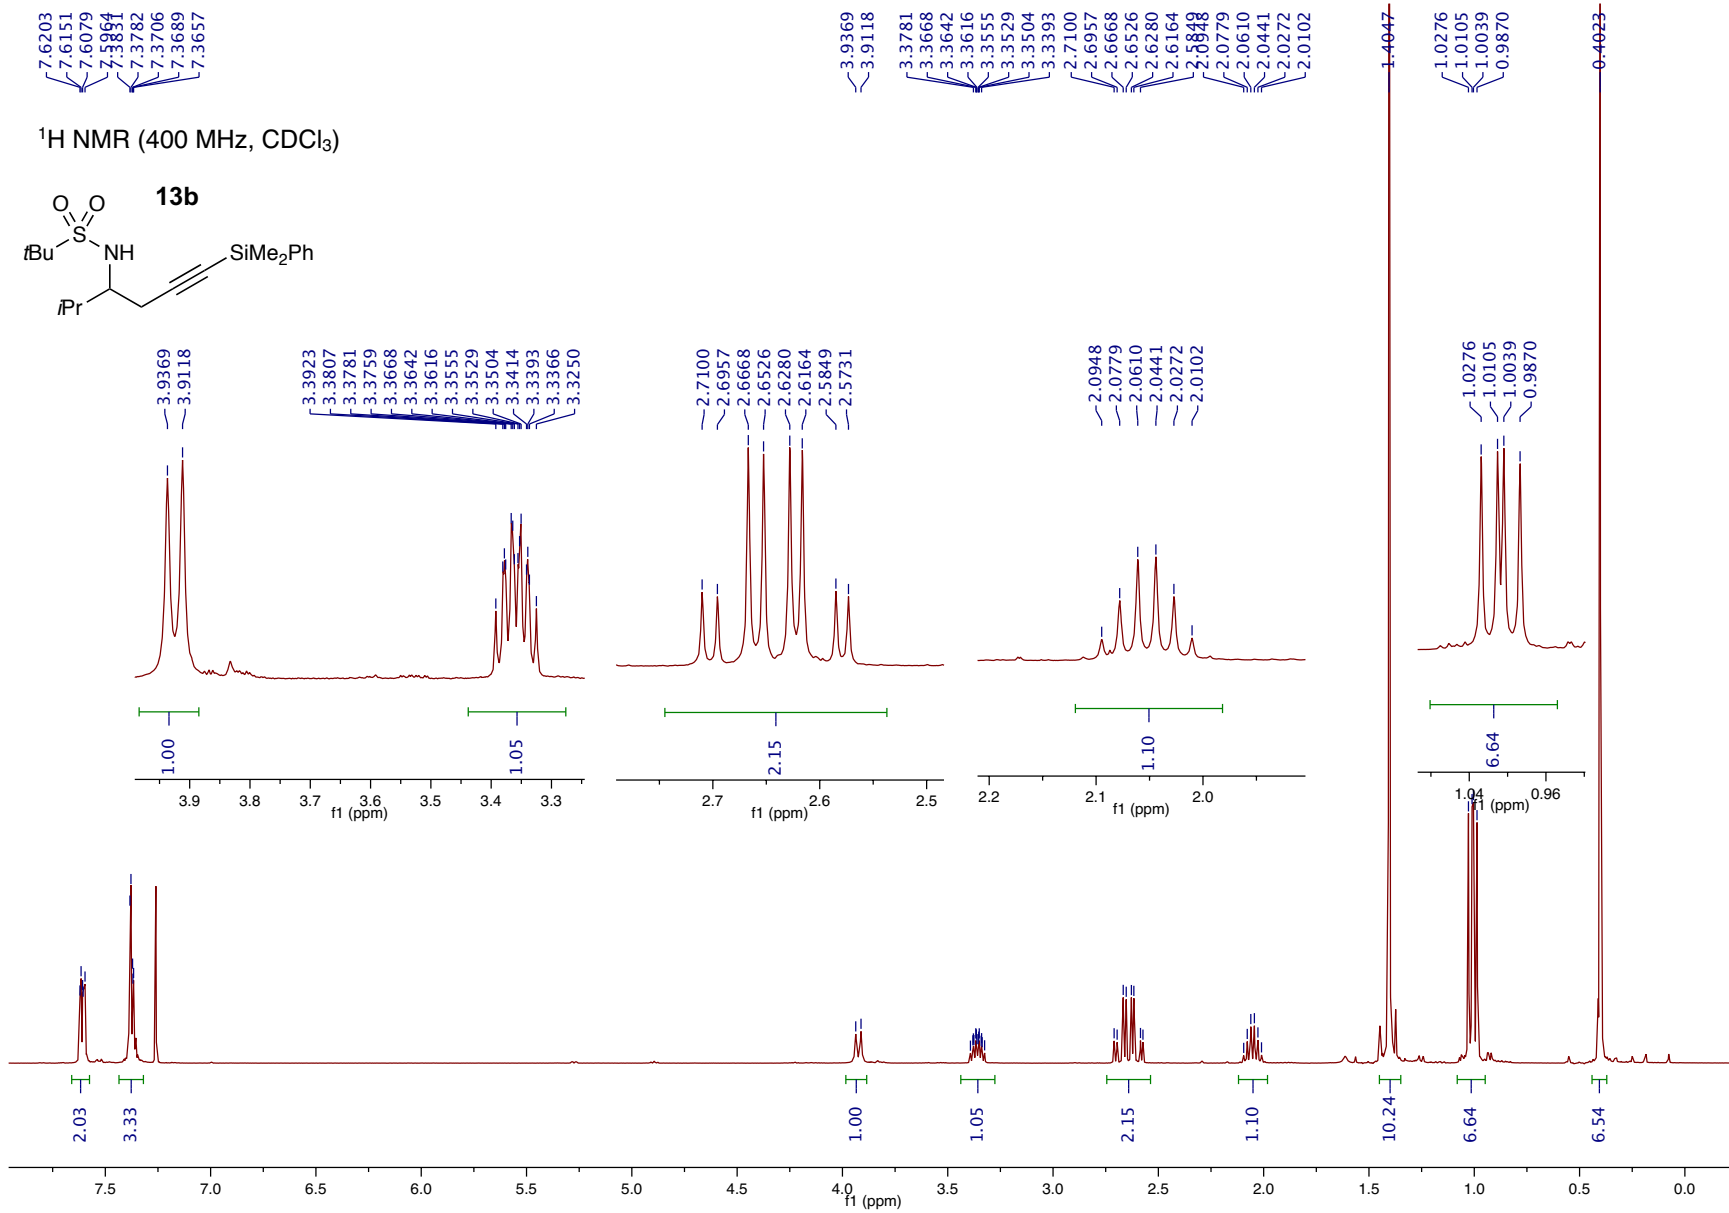

<sup>13</sup>C NMR (100 MHz, CDCl<sub>3</sub>)

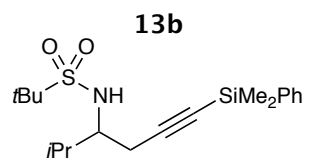

137.19  
133.71  
129.55  
128.02

104.64

86.33

77.48 CDCl<sub>3</sub>  
77.16 CDCl<sub>3</sub>  
76.84 CDCl<sub>3</sub>

60.22  
58.42

32.21

24.84  
24.47

19.09

-0.70

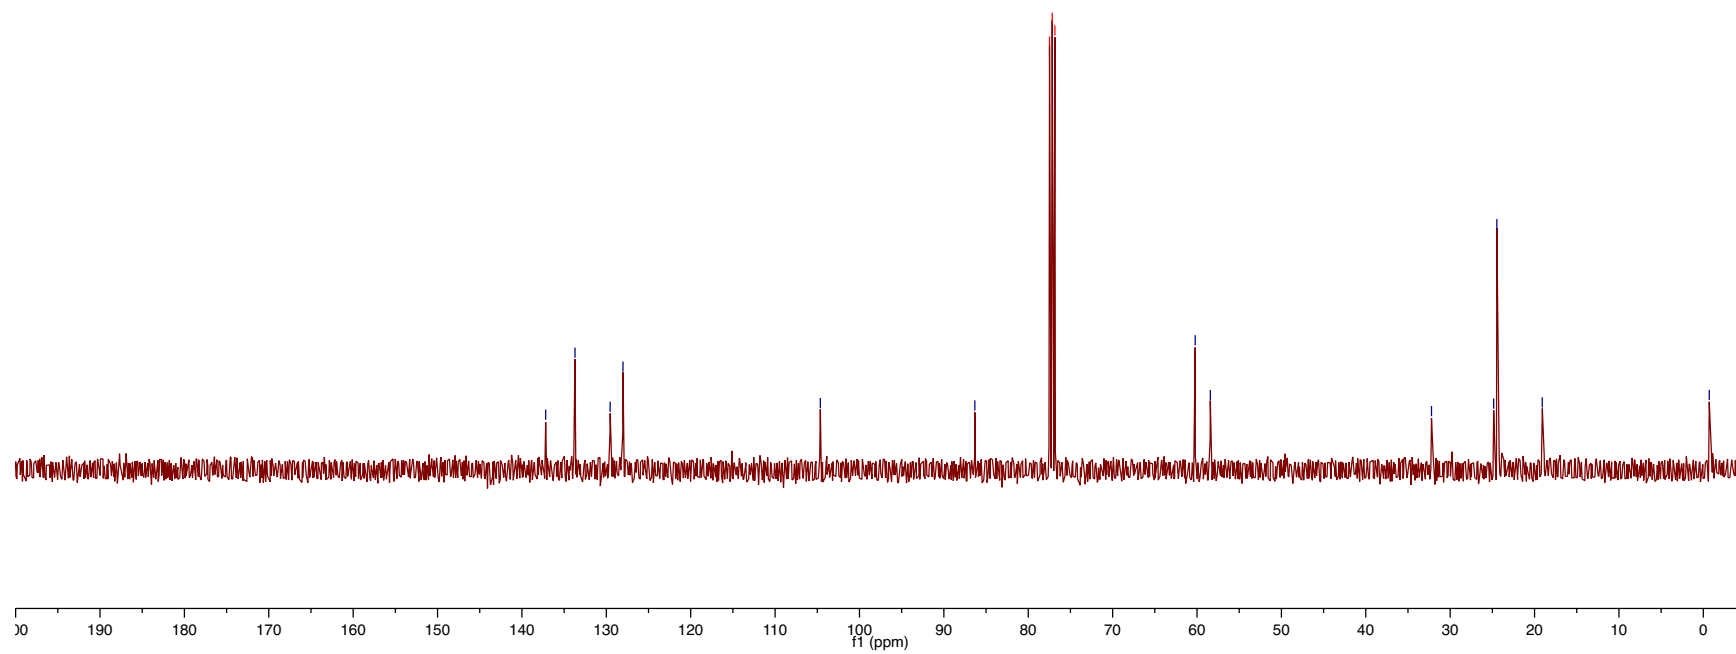

7.4284  
7.4243  
7.4097  
7.4049  
7.3180  
7.3135  
7.3002  
7.2980  
7.2963  
7.2942  
7.2925  
7.2792  
7.2683  
7.2639  
7.2609  
7.2593  
7.2575  
7.2553  
7.2455  
7.2421  
7.2409  
7.2265  
7.2242  
7.2201  
7.2064  
7.2046  
7.1936  
7.1605

4.9765

4.0319  
4.0065

3.4439  
3.4326  
3.4255  
3.4185  
3.4072  
3.3988  
3.3799  
3.3357

2.9565  
2.9460  
2.9378  
2.9275  
2.3182  
2.3108  
2.3009  
2.2936  
2.2836  
2.2763  
2.2663  
2.2590  
2.2492  
2.2418

1.3325  
0.9732  
0.9561  
0.9443  
0.9270

0.2747  
0.2697

<sup>1</sup>H NMR (400 MHz, CDCl<sub>3</sub>)

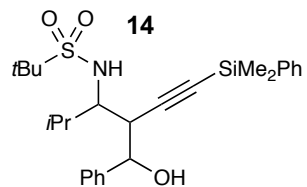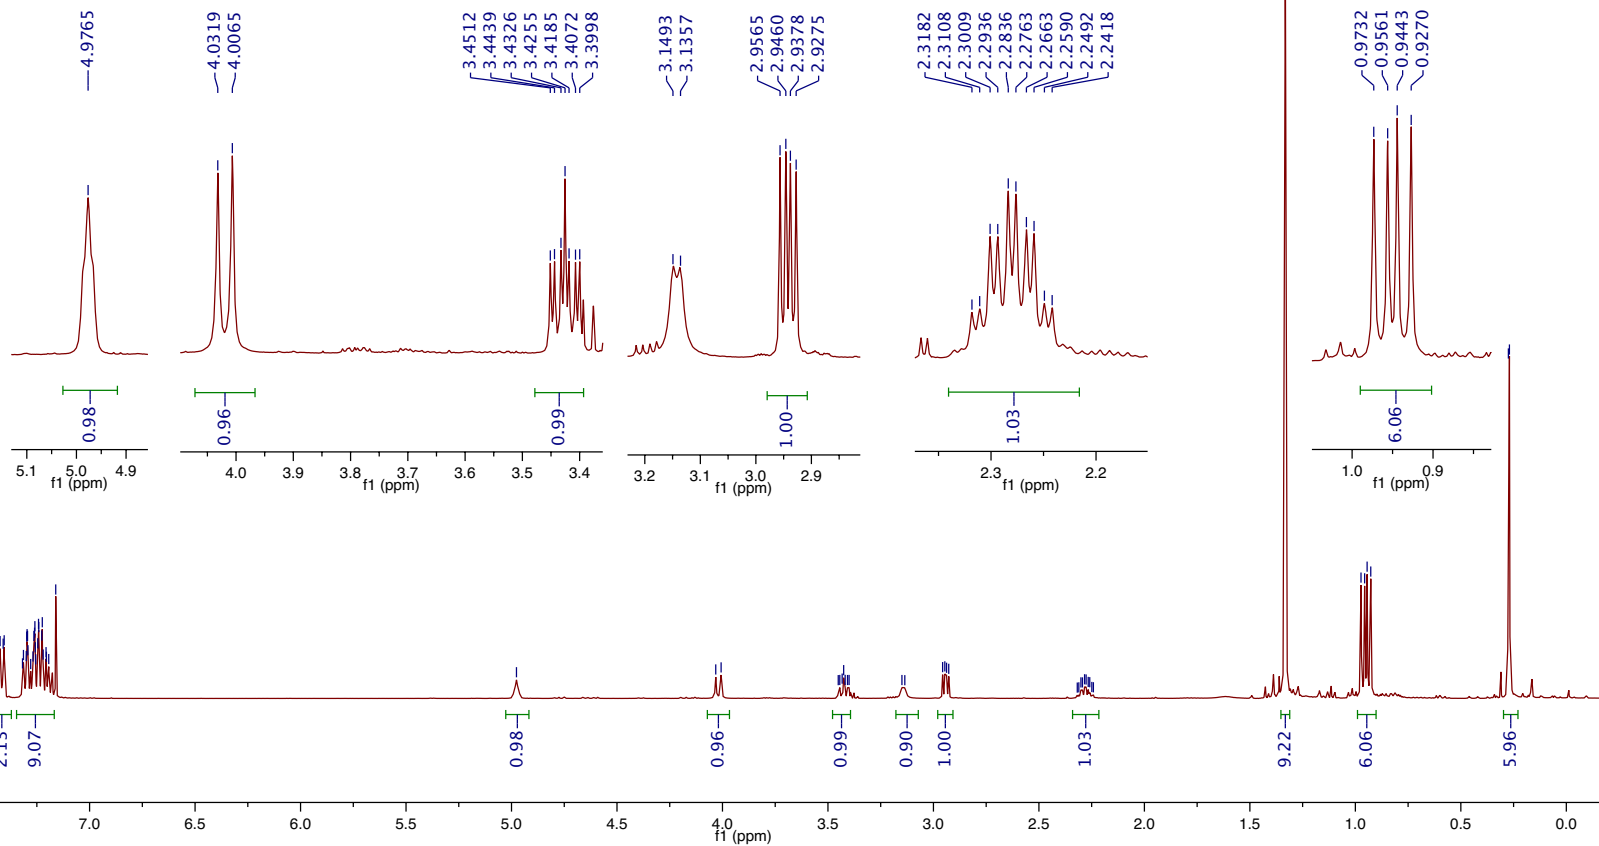



<sup>13</sup>C NMR (100 MHz, CDCl<sub>3</sub>)

**14**

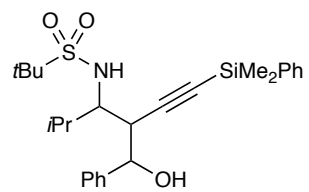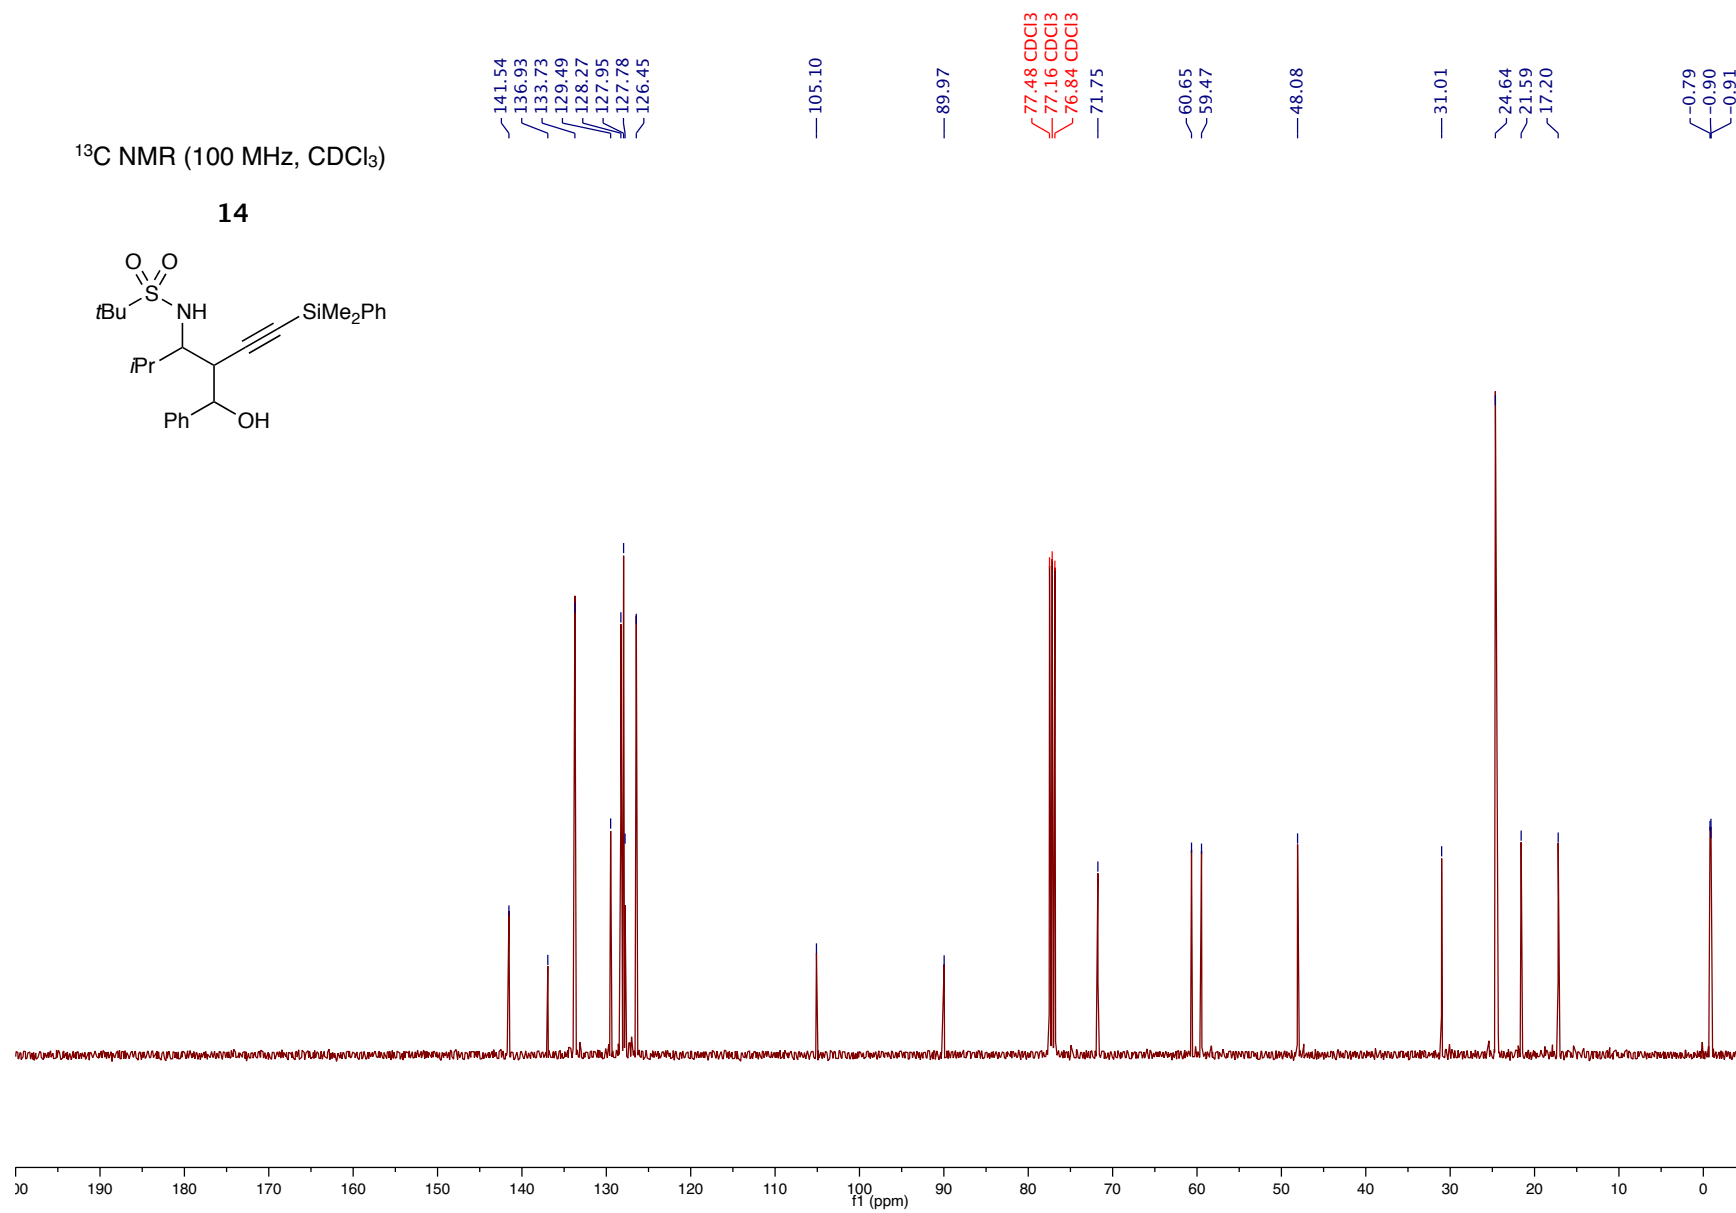

Supplement: mmc1 [file mmc1.pdf]
